# Supplementary material for: Oral supplementation of gut microbial metabolite indole-3-acetate alleviates diet-induced steatosis and inflammation in mice
Source: eLife journal article supplement (doi:10.7554/elife.87458), 2023-06-06
Supplement: supp5 [file elife-87458-supp5-v1.pdf]

# Proteomic Data processing workflow

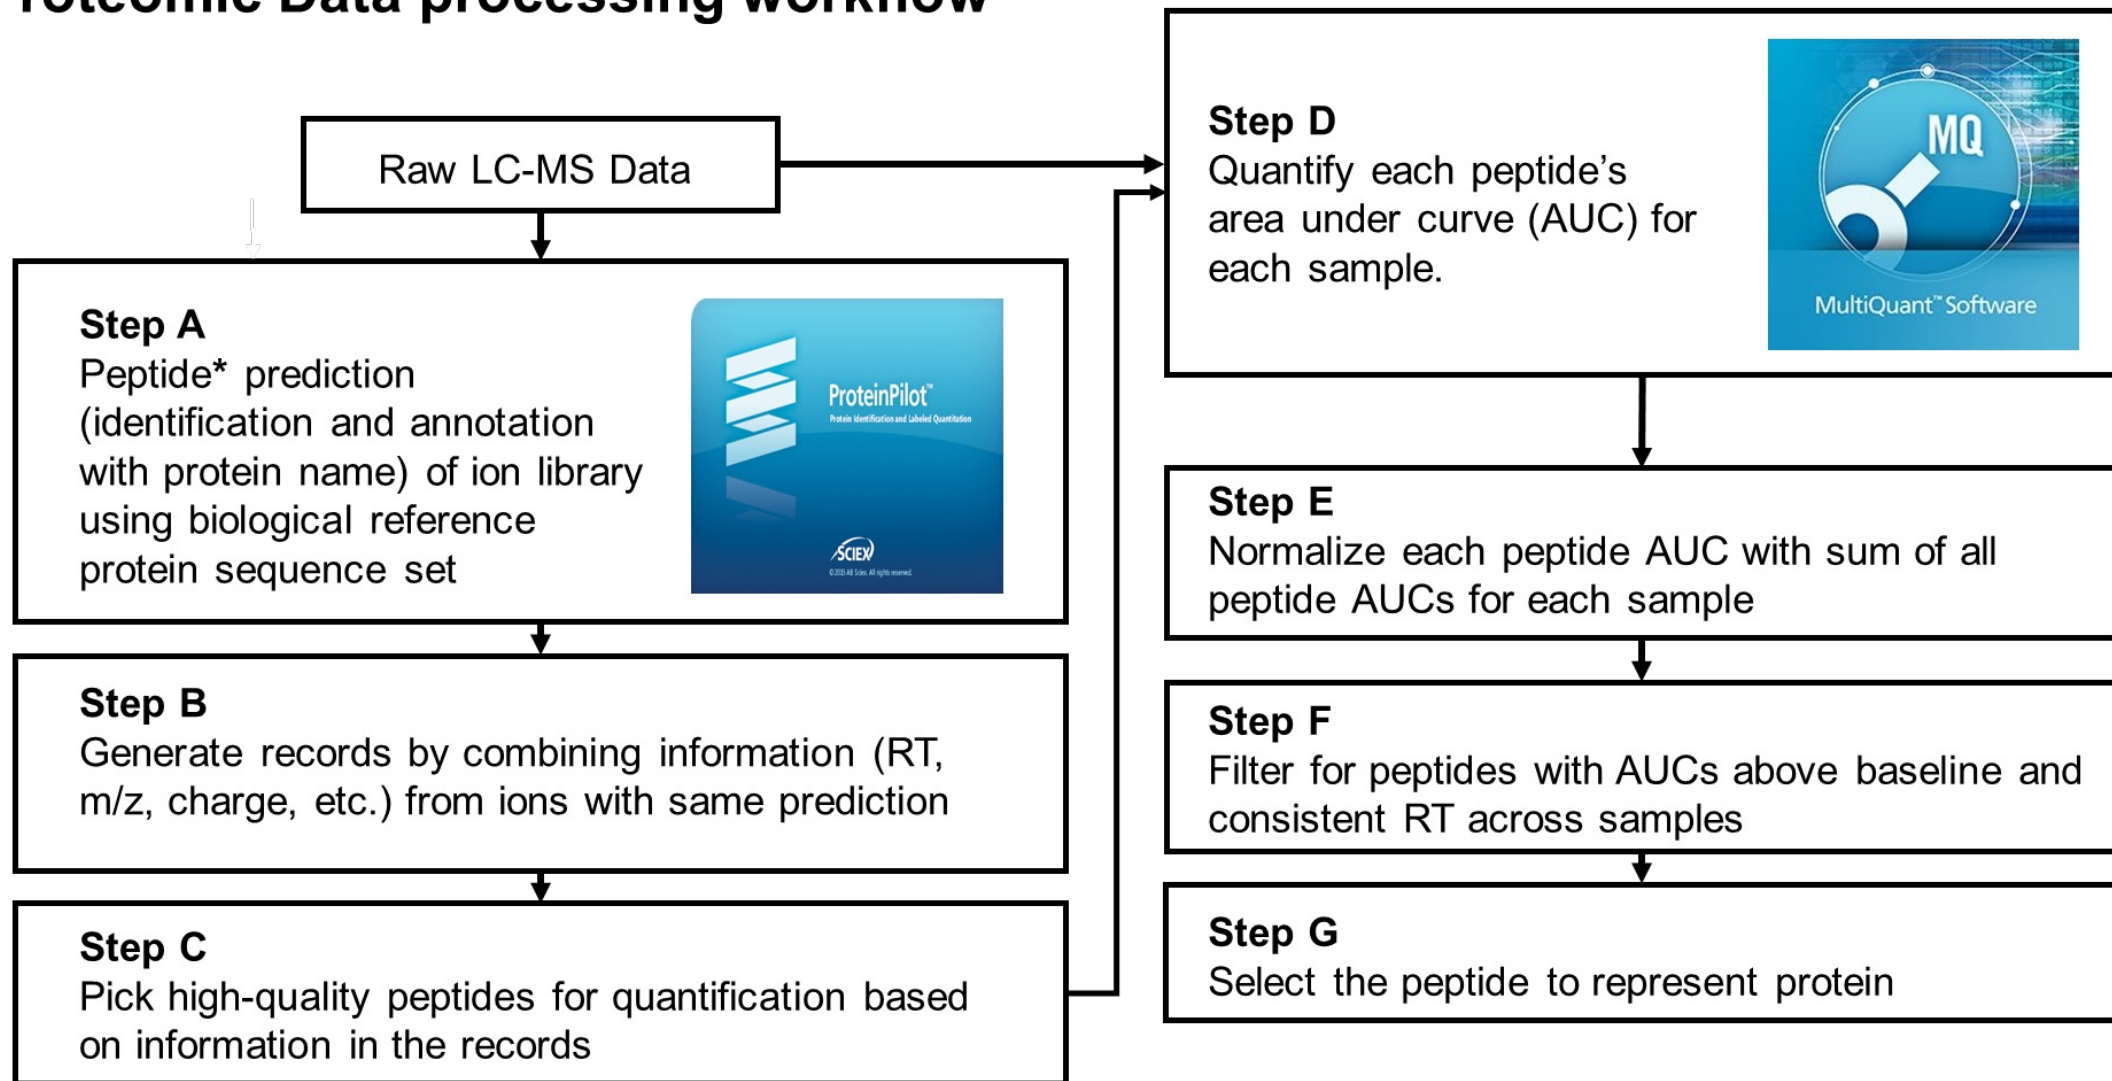

\*Peptide refers to ion comprising an amino acid sequence with certain modification and charge, unless otherwise noted
